# Supplementary material
Source: Springer Nature journal article supplement (https://www.springermedizin.de/resource/supplementary/12885_2011_3532_MOESM1_ESM.pdf/9463864)
Supplement: MOESM1 [file 9463864]

GAIL-SBSP



S-GAIL-SBSP



E-GAIL-SBSP



Legend: Observed (white bar), Expected (grey bar)
